# Supplementary material
Source: publisher figshare collection journal article supplement (https://acs.figshare.com/ndownloader/files/22124862)
Supplement: Supplementary file 1 [file 22124862]

# Catalytic Transfer Hydrogenation of Levulinic Acid to $\gamma$ -Valerolactone over $\text{Ni}_3\text{P}$ - $\text{CePO}_4$ Catalysts

*Zhiquan Yu,<sup>†</sup> Fanxing Meng,<sup>†</sup> Yao Wang,<sup>†‡</sup> Zhichao Sun,<sup>†</sup> Yingya Liu,<sup>†</sup> Chuan Shi,<sup>†</sup> Wei Wang,<sup>†§</sup> and  
Anjie Wang<sup>†‡\*</sup>*

<sup>†</sup> State Key Laboratory of Fine Chemicals, School of Chemical Engineering, Dalian University of Technology, Dalian 116024, China

<sup>‡</sup> Liaoning Key Laboratory of Petrochemical Technology and Equipment, Dalian University of Technology, Dalian 116024, China

<sup>§</sup> Yinchuan Energy Institute, Yongning Wangtaibu, Yinchuan 750105, China

Corresponding author: Prof. Anjie Wang

E-mail: [ajwang@dlut.edu.cn](mailto:ajwang@dlut.edu.cn)

## Results and Discussion

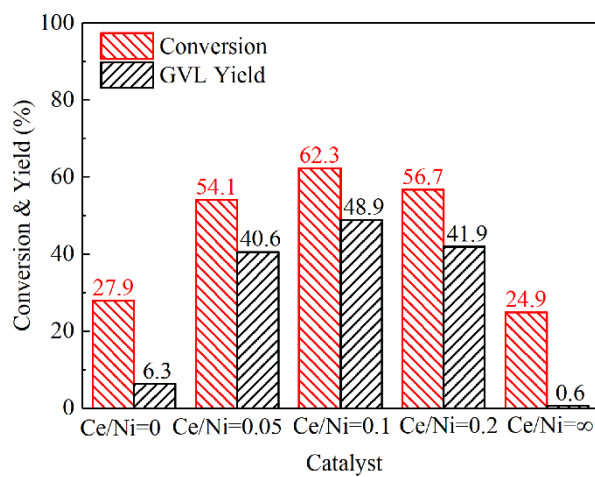

**Figure S1.** Catalytic performance of the  $\text{Ni}_3\text{P-CePO}_4(x)$  catalyst in the CTH of LA to GVL. Reaction conditions: LA 20 mmol,  $\text{Ni}_3\text{P-CePO}_4(x)$  0.2 g, 2-propanol 38 mL, 180 °C, 60 min, 750 rpm.

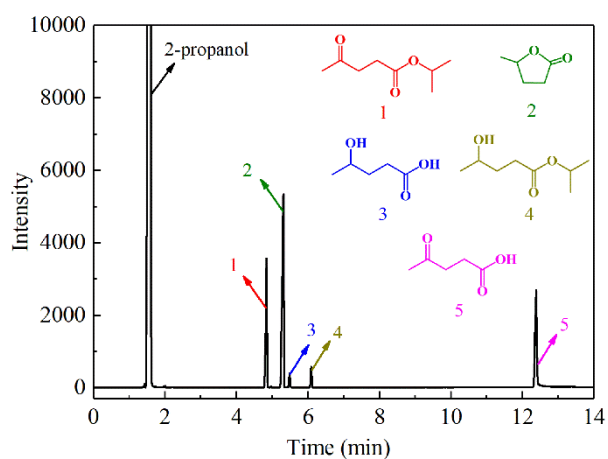

**Figure S2.** Representative gas chromatogram of the liquid product from CTH of LA.

**Table S1.** Kinetic parameters for the CTH of LA to GVL over Ni<sub>3</sub>P-CePO<sub>4</sub>(0.1) catalyst.

| Temperature<br>(°C) | Rate constant<br>(mol·L <sup>-1</sup> ·min <sup>-1</sup> ) <sup>a</sup> | Apparent activation<br>energy (kJ·mol <sup>-1</sup> ) <sup>b</sup> |
|---------------------|-------------------------------------------------------------------------|--------------------------------------------------------------------|
| 160                 | $1.8 \times 10^{-3}$                                                    | 73.9                                                               |
| 170                 | $2.6 \times 10^{-3}$                                                    |                                                                    |
| 180                 | $4.6 \times 10^{-3}$                                                    |                                                                    |
| 190                 | $6.9 \times 10^{-3}$                                                    |                                                                    |
| 200                 | $9.8 \times 10^{-3}$                                                    |                                                                    |

<sup>a</sup> Assuming a pseudo zero order to the concentration of LA.<sup>b</sup> According to Arrhenius equation.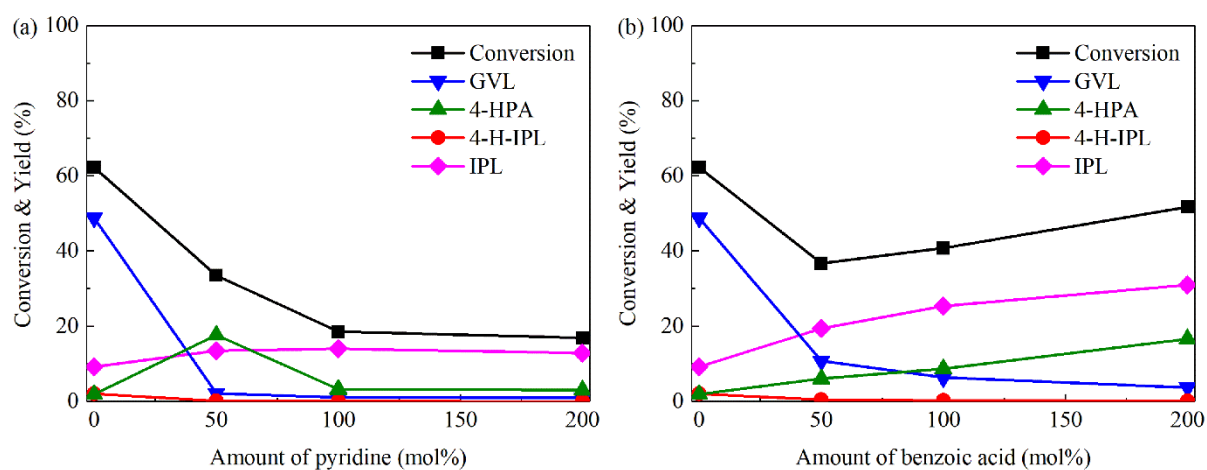**Figure S3.** Variation of LA conversion and product yield with amount of (a) pyridine or (b) benzoic acid in CTH of LA over Ni<sub>3</sub>P-CePO<sub>4</sub>(0.1) catalyst.
